# Supplementary material
Source: publisher site journal article supplement (http://kjim.org/upload/media/kjim-2022-292-Supplementary-Table-1.pdf)
Supplement: Supplementary file 1 [file kjim-2022-292-Supplementary-Table-1.pdf]

**Supplementary Table 1. Biochemical parameters and blood pressure in the study population according to DIO2 Thr92Ala genotype at baseline (n = 118)**

| Variable                             | Hypothyroidism  |                |                     | p value            |
|--------------------------------------|-----------------|----------------|---------------------|--------------------|
|                                      | Total (n = 118) | T/T (n = 32)   | T/A or A/A (n = 86) |                    |
| Sex                                  |                 |                |                     | 0.124              |
| Male                                 | 17 (14.4)       | 2 (6.3)        | 15 (17.4)           |                    |
| Female                               | 101 (85.6)      | 30 (93.2)      | 71 (82.6)           |                    |
| Age, yr                              |                 |                |                     | 0.691              |
| 40–50                                | 56 (47.4)       | 15 (46.9)      | 41 (47.7)           |                    |
| 50–60                                | 31 (26.3)       | 10 (31.2)      | 21 (24.4)           |                    |
| 60–70                                | 31 (26.3)       | 7 (21.9)       | 24 (27.9)           |                    |
| BMI, kg/m <sup>2</sup>               | 25.10 ± 3.15    | 24.76 ± 3.35   | 25.23 ± 3.09        | 0.479              |
| Drinking                             |                 |                |                     | 0.523              |
| Non-drinking                         | 76 (64.4)       | 23 (71.9)      | 53 (61.6)           |                    |
| Former-drinking                      | 5 (4.2)         | 2 (6.2)        | 3 (3.5)             |                    |
| Drinking                             | 36 (30.5)       | 7 (21.9)       | 29 (33.7)           |                    |
| NA                                   | 1 (0.9)         | 0              | 1 (1.2)             |                    |
| Smoking                              |                 |                |                     | 0.391              |
| Non-smoking                          | 96 (81.4)       | 29 (90.6)      | 67 (77.9)           |                    |
| Former-smoking                       | 10 (8.5)        | 2 (6.3)        | 8 (9.3)             |                    |
| Smoking                              | 9 (7.6)         | 1 (3.1)        | 8 (9.3)             |                    |
| NA                                   | 3 (2.5)         | 0              | 3 (3.5)             |                    |
| Medication of anti-hypertension      |                 |                |                     | 0.145              |
| No                                   | 97 (82.2)       | 29 (90.6)      | 68 (79.1)           |                    |
| Yes                                  | 21 (17.8)       | 3 (9.4)        | 18 (20.9)           |                    |
| Medication of anti-diabetes mellitus |                 |                |                     | 0.100              |
| No                                   | 117 (99.2)      | 31 (96.9)      | 86 (100.0)          |                    |
| Yes                                  | 1 (0.8)         | 1 (3.1)        | 0                   |                    |
| Medication of anti-dyslipidemia      |                 |                |                     | 1.000              |
| No                                   | 118 (100)       | 32 (100)       | 86 (100)            |                    |
| Yes                                  | 0               | 0              | 0                   |                    |
| SBP (left), mmHg                     | 120.86 ± 19.06  | 112.63 ± 17.68 | 123.93 ± 18.74      | 0.004 <sup>a</sup> |
| DBP (left), mmHg                     | 80.73 ± 12.27   | 74.81 ± 10.57  | 82.93 ± 12.19       | 0.001 <sup>a</sup> |
| SBP (right), mmHg                    | 122.42 ± 20.44  | 116.38 ± 19.67 | 124.67 ± 20.38      | 0.050              |
| DBP (right), mmHg                    | 80.34 ± 12.63   | 75.06 ± 9.89   | 82.30 ± 13.03       | 0.005 <sup>a</sup> |
| SBP <sup>b</sup> , mmHg              | 121.64 ± 19.23  | 114.50 ± 18.40 | 124.30 ± 18.96      | 0.013 <sup>a</sup> |
| DBP <sup>b</sup> , mmHg              | 80.53 ± 11.93   | 74.94 ± 9.69   | 82.62 ± 12.06       | 0.002 <sup>a</sup> |
| Fasting glucose, mg/dL               | 89.23 ± 22.04   | 93.16 ± 40.18  | 87.77 ± 8.47        | 0.239              |
| Insulin, $\mu$ IU/mL                 | 7.41 ± 3.27     | 7.37 ± 3.92    | 7.42 ± 3.02         | 0.935              |
| HbA1c, %                             | 5.66 ± 0.56     | 5.64 ± 0.64    | 5.67 ± 0.53         | 0.789              |
| Total protein, g/dL                  | 7.39 ± 0.44     | 7.38 ± 0.50    | 7.40 ± 0.42         | 0.839              |
| Albumin, g/dL                        | 4.51 ± 0.27     | 4.54 ± 0.24    | 4.50 ± 0.27         | 0.482              |
| Creatinine, mg/dL                    | 0.76 ± 0.18     | 0.75 ± 0.18    | 0.76 ± 0.18         | 0.742              |

**Supplementary Table 1. Continued**

| Variable                 | Hypothyroidism  |                |                     | p value |
|--------------------------|-----------------|----------------|---------------------|---------|
|                          | Total (n = 118) | T/T (n = 32)   | T/A or A/A (n = 86) |         |
| Total bilirubin, mg/dL   | 0.59 ± 0.27     | 0.65 ± 0.28    | 0.57 ± 0.26         | 0.145   |
| AST, IU/L                | 27.54 ± 34.06   | 35.50 ± 62.90  | 24.58 ± 11.03       | 0.122   |
| ALT, IU/L                | 24.50 ± 36.70   | 32.81 ± 67.47  | 21.41 ± 12.57       | 0.134   |
| Total cholesterol, mg/dL | 200.28 ± 36.15  | 199.34 ± 28.87 | 200.63 ± 38.65      | 0.865   |
| HDL-C, mg/dL             | 51.25 ± 13.75   | 53.53 ± 14.32  | 50.41 ± 13.52       | 0.274   |
| Ca, mg/dL                | 9.47 ± 0.46     | 9.42 ± 0.54    | 9.49 ± 0.43         | 0.451   |
| Na, mmol/L               | 142.49 ± 2.10   | 142.44 ± 1.56  | 142.51 ± 2.27       | 0.865   |
| K, mmol/L                | 4.41 ± 0.32     | 4.43 ± 0.37    | 4.40 ± 0.31         | 0.642   |
| Cl, mmol/L               | 103.03 ± 2.48   | 103.31 ± 2.29  | 102.92 ± 2.55       | 0.446   |
| Free T4, ng/mL           | 1.50 ± 0.32     | 1.24 ± 0.43    | 1.56 ± 0.32         | 0.421   |
| TSH, µU/mL               | 0.90 ± 0.93     | 2.09 ± 0.40    | 0.66 ± 0.81         | 0.181   |

Values are presented as number (%) or mean ± standard deviation. The chi-squared test and *t* test were used to evaluate the significance of the correlations between DIO2 polymorphisms and clinical parameters.

DIO2, type 2 iodothyronine deiodinase; BMI, body mass index; NA, not available; SBP, systolic blood pressure; DBP, diastolic blood pressure; HbA1c, glycated hemoglobin; AST, aspartate transaminase; ALT, alanine transferase; HDL-C, high-density lipoprotein cholesterol; T4, thyroxine; TSH, thyroid-stimulating hormone.

<sup>a</sup>*p* value by analysis of *t* test as appropriate.

<sup>b</sup>Average of the left and right sides.
